# Supplementary material for: Nontrivial electrophoresis of silica nano and microrods in a nematic liquid crystal
Source: Royal Society of Chemistry journal article supplement (doi:10.1039/d2sm00675h), 2022-01-01
Supplement: d2sm00675h4.pdf [file d2sm00675h4.pdf]

Supplementary Information for

**Nontrivial electrophoresis of silica nano and microrods in a nematic liquid crystal**

Muhammed Rasi M<sup>1</sup>, Archana S<sup>1</sup>, Ravi Kumar Pujala<sup>2</sup> and Surajit Dhara<sup>1\*</sup>

<sup>1</sup>School of Physics, University of Hyderabad, Hyderabad-500046, India

<sup>2</sup>Department of Physics, Indian Institute of Science Education and Research, Tirupati, Andhra Pradesh 517505, India

Frequency dependence of electrophoretic velocities of nano and micro-rods

We have measured the frequency dependent propulsion velocity of the rods. Figure 9 shows the frequency dependence of the velocity of both the nano- and micro-rods in the frequency range of 10-120 Hz. It increases rapidly with frequency to a peak velocity and then de-creases. Overall the frequency response of the silica rods shows a behavior similar to that of the spherical particles. According to the induced charge electrophoresis, the frequency dependence of velocity of a spherical particle is given by

$$V(\omega) = V^0 \frac{\omega^2 \tau_e^2}{(1 + \omega^2 \tau_p^2)(1 + \omega^2 \tau_e^2)} \dots \dots \dots (1)$$

Where  $\omega = 2\pi f$ ,  $\tau_p = \lambda_D L / 2D$  is the particle charging time and  $\tau_e = \lambda_D d / 2D$  is the electrode charging time. The experimental data is fitted with Eq. (1), and the continuous red lines show the best fits to the data. The fit parameters are  $\tau_p = 0.051$  s and  $\tau_e = 0.021$  s for the nanorods and  $\tau_p = 0.049$  s and  $\tau_e = 0.017$  s for the micro-rods.

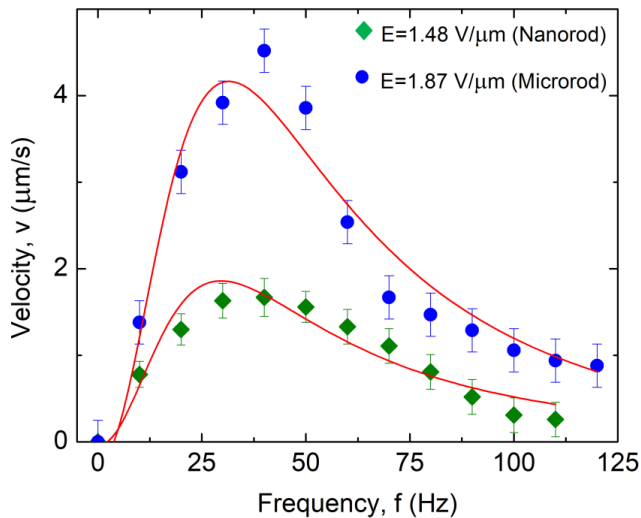

FIG.1: Frequency dependence of velocity of nanorods (solid circles) and microrods (solid diamonds). Solid curves are best fits to Eq. (1).

### Description of movies

Movie-S1 (Movie S1.avi): A microrod oriented perpendicular to the director (in a cell with in-plane stripe electrodes) moving at angle with the rubbing direction under increasing DC electric field (1-12  $V/\mu m$ ). The in-plane electric field is applied perpendicular to the rubbing direction.

Movie-S2 (Movie S2.avi): Effect of AC electric field (50Hz, 1.6  $V/\mu m$ ) on a silica microrod in MLC-6608. Video recorded with additional  $\lambda$ -plate in POM.

Movie-S3 (Movie S3.avi): Effect of AC electric field (50Hz, 1.8  $V/\mu m$ ) on a silica nanorod in MLC-6608. Video recorded with additional  $\lambda$ -plate in POM.
